# Supplementary material for: Nitrite ion-induced fluorescence quenching of luminescent BSA-Au25nanoclusters: mechanism and application
Source: Royal Society of Chemistry journal article supplement (doi:10.1039/c3an02291a), 2014-01-01
Supplement: c3an02291a1.pdf [file c3an02291a1.pdf]

## SUPPORTING INFORMATION

### Nitrite ion-induced fluorescence quenching of luminescent BSA-Au<sub>25</sub> nanoclusters: mechanism and application

Binesh Unnikrishnan,<sup>a</sup> Shih-Chun Wei,<sup>a</sup> Wei-Jane Chiu,<sup>a</sup> Jinshun Cang,<sup>c</sup> Pang-Hung Hsu,<sup>\*,a,b</sup>  
and Chih-Ching Huang<sup>\*,a,b,d</sup>

<sup>a</sup>*Institute of Bioscience and Biotechnology, National Taiwan Ocean University, 20224, Keelung, Taiwan, E-mail: [phsu@ntou.edu.tw](mailto:phsu@ntou.edu.tw)*

<sup>b</sup>*Center of Excellence for the Oceans, National Taiwan Ocean University, 20224, Keelung, Taiwan. Email: [huangcing@ntou.edu.tw](mailto:huangcing@ntou.edu.tw)*

<sup>c</sup>*Department of Chemistry, Yancheng Institute of Industry Technology, Jiangsu, 224005, P. R. China*

<sup>d</sup>*School of Pharmacy, College of Pharmacy, Kaohsiung Medical University, Kaohsiung 80708, Taiwan*

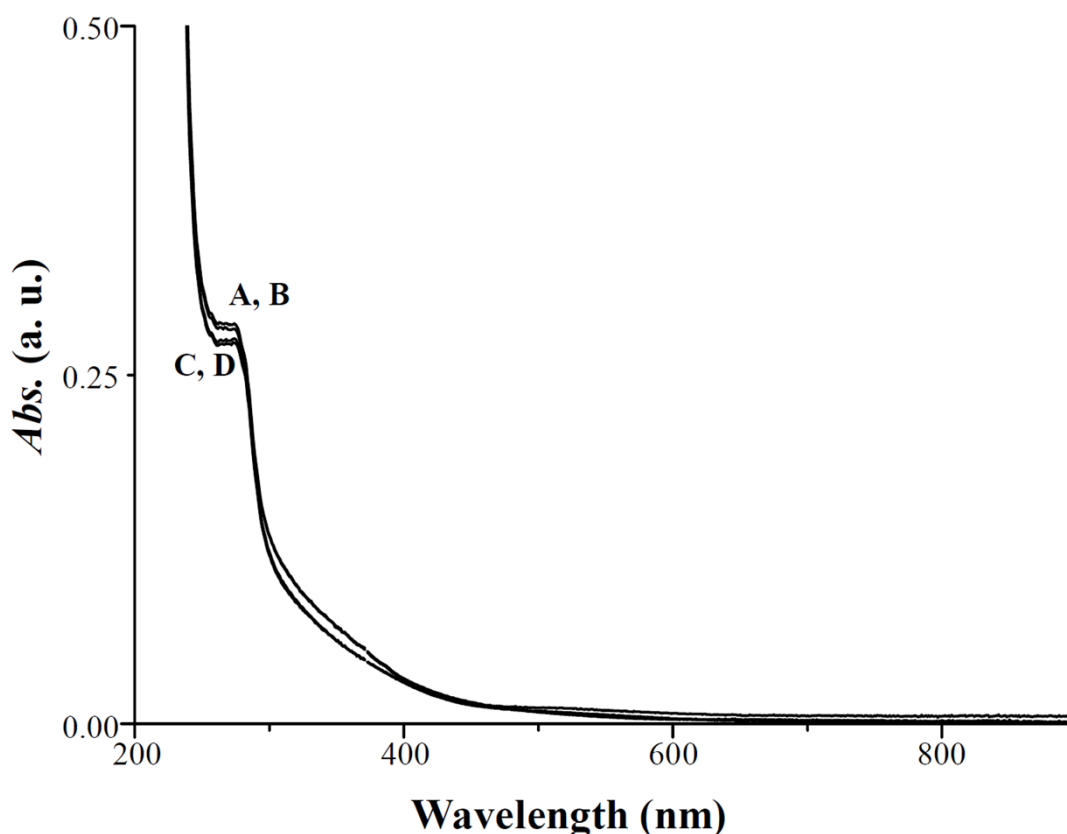

**Fig. S1.** UV-Vis absorption spectra of 50 mM sodium phosphate (pH 3) containing (A, C) BSA-Au NCs/1<sup>st</sup>d (0.001×) and (B, D) BSA-Au NCs/7<sup>th</sup>d (0.001×) in the (A, B) absence and (C, D) presence of nitrite (10 μM). The absorbance (*Abs*) is plotted in arbitrary units (a. u.).

Other conditions were the same as those described in Fig. 1.

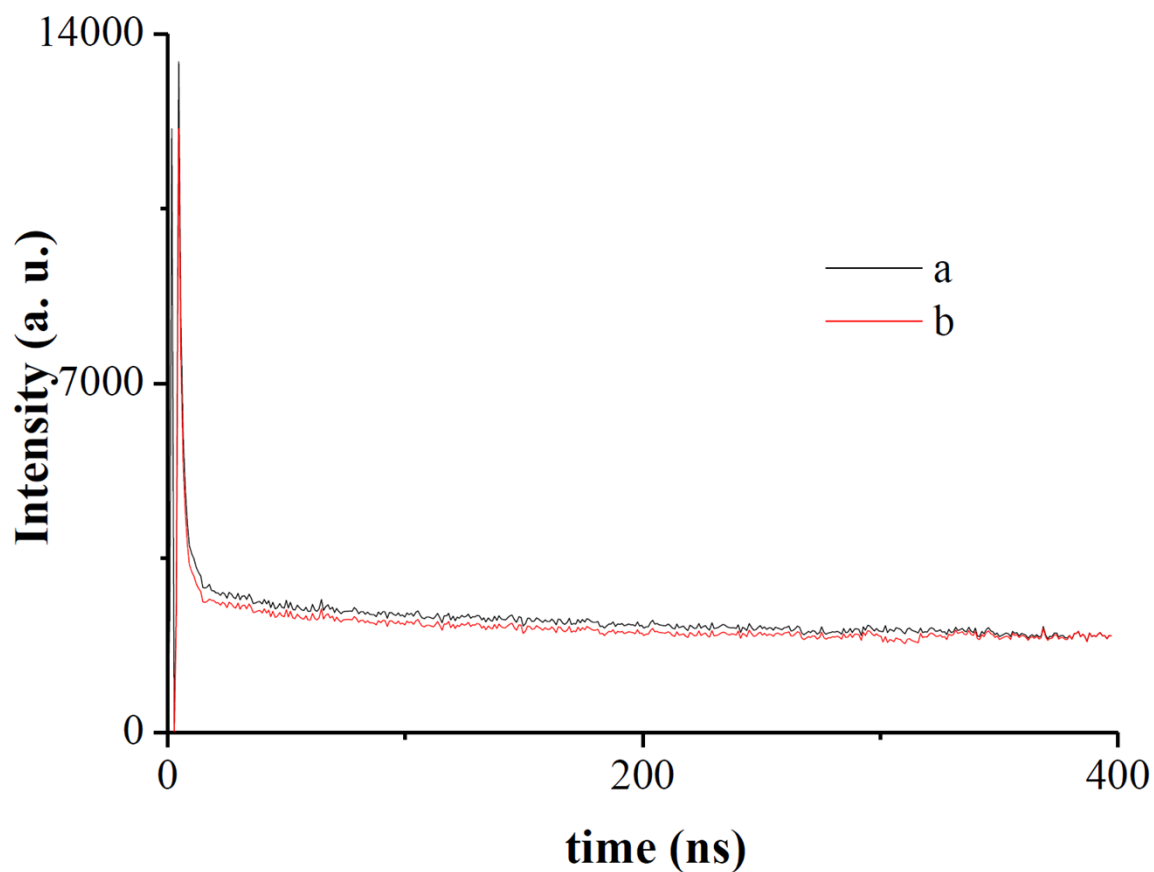

**Fig. S2.** Fluorescence lifetime, after excitation at 375 nm, of the BSA-Au NCs/7<sup>th</sup>d (2 μM) in the (a) absence and (b) presence of 10 μM nitrite. The lifetimes ( $\tau_1/\tau_2$ ) of BSA-Au NCs in the (a) absence and (b) presence of 10 μM nitrite was obtained to be 121.86(86.81%)/1.77(13.19%) ns and 114.52(86.08%)/1.76(13.92%) ns, respectively, by fitting a biexponential fluorescence decay. Other conditions were the same as described in Fig. 1.

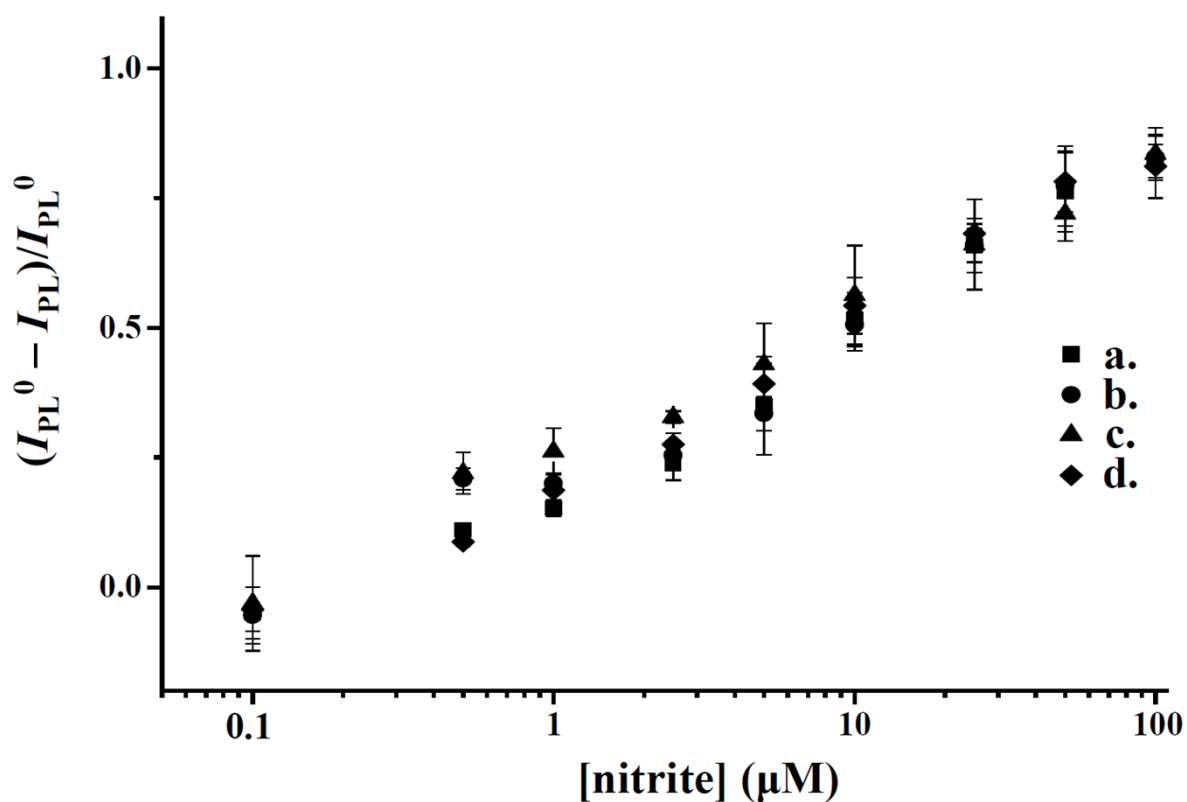

**Fig. S3.** Analyses of representative samples of (a) river water, (b) tap water, (c) sea water, and (d) lake water using BSA-Au NCs/NCM probes for nitrite detection. Diluted (twofold) water samples were spiked with nitrite (0–100  $\mu\text{M}$ ). Error bars represent standard deviations from four repeated experiments. Other conditions were the same as those described in Fig. 5

**Table S1.** Comparison of parameters of BSA-Au NCs/NCM probe with those of other nanoparticle based fluorometric/colorimetric nitrite sensors

| Method       | Probe material                                       | Limit of detection | Real sample test                                                   | References |
|--------------|------------------------------------------------------|--------------------|--------------------------------------------------------------------|------------|
| Fluorescence | BSA-Au NCs/NCM                                       | 100 nM             | environmental water samples and human urine                        | This work  |
| Fluorescence | <sup>a</sup> Rh 6G-fuctionalized silica nanoparticle | 1.2 μM             | -                                                                  | [1]        |
| Fluorescence | BSA-Au NCs based NAND logic gate                     | 80 nM              | tap water, mineral water, milk powder, ham sausage and human urine | [2]        |
| Fluorescence | BSA-Au NCs                                           | 30 nM              | water samples                                                      | [3]        |
| Fluorescence | BSA-Au NCs                                           | 1 nM               | water samples                                                      | [4]        |
| Fluorescence | 1-aminopyrene nanoparticles                          | 43 nM              | water samples                                                      | [5]        |
| Colorimetry  | Citrate capped AuNPs                                 | 100 nM             | tap water                                                          | [6]        |
| Colorimetry  | <sup>b</sup> DPPA and MTA functionalized Au NPs      | 22 μM              | lake water                                                         | [7]        |

<sup>a</sup>p-hydroxybenzaldehyde rhodamine 6G hydrozone

<sup>b</sup>5-[1,2]dithiolan-3-yl-pentanoic acid [2-(4-amino-phenyl)ethyl]amide modified Au NPs and (11-mercapto-undecyl)-trimethyl-ammonium

## References

- [1] L. Wang, B. Li, L. Zhang, L. Zhang and H. Zhao, *Sens. Actuators, B*, 2012, **171–172**, 946–953.
- [2] J. Zhang, C. Chen, X. Xu, X. Wang and X. Yang, *Chem. Commun.*, 2013, **49**, 2691–2693.
- [3] Q. Yue, L. Sun, T. Shen, X. Gu, S. Zhang and J. Liu, *J. Fluoresc.*, 2013, **23**, 1313–1318.
- [4] H. Liu, G. Yang, E.S. Abdel-Halim and J.-J. Zhu, *Talanta*, 2013, **104**, 135–139.
- [5] L. Wang, L. Dong, G. -R. Bian, L.-Y. Wang, T.-T. Xia and H.-Q. Chen, *Anal. Bioanal. Chem.*, 2005, **382**, 1300–1303.
- [6] J. Zhang, C. Yang, X. Wang and X. Yang, *Analyst*, 2012, **137**, 3286–3292.
- [7] W.L. Daniel, M.S. Han, J.-S. Lee and C.A. Mirkin,, *J. Am. Chem. Soc.*, 2009, **131**, 6362–6363.
